# Supplementary material
Source: publisher figshare collection journal article supplement (https://acs.figshare.com/ndownloader/files/14368865)
Supplement: Supplementary file 1 [file 14368865]

## Supporting Information

# **Lithiophilic Ag Nanoparticle Layer on Cu Current Collector towards Stable Li Metal Anode**

*Zhen Hou,<sup>†,‡, ||</sup> Yikang Yu,<sup>‡, ||</sup> Wenhui Wang,<sup>‡, ||</sup> Xixia Zhao,<sup>‡</sup> Qian Di,<sup>‡</sup>*

*Qianwen Chen,<sup>†,‡</sup> Wen Chen,<sup>†,‡</sup> Yulian Liu,<sup>‡</sup> and Zewei Quan<sup>\*,‡</sup>*

*<sup>†</sup>School of Chemistry and Chemical Engineering, Harbin Institute of Technology, Harbin 150001, P. R. China*

*<sup>‡</sup>Department of Chemistry, Southern University of Science and Technology (SUSTech), Shenzhen, Guangdong 518055, P. R. China*

*\*E-mail: [quanzw@sustc.edu.cn](mailto:quanzw@sustc.edu.cn)*

*<sup>||</sup>These authors contributed equally*

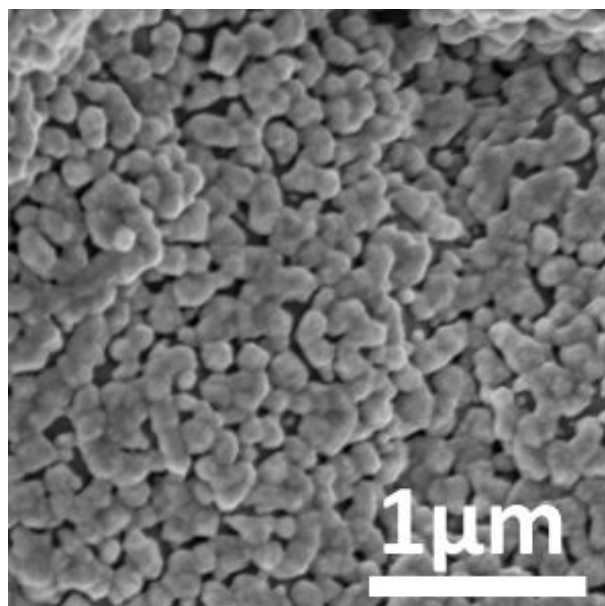

**Figure S1.** SEM image of CuAg sample synthesized via electroless plating time with 3 min.

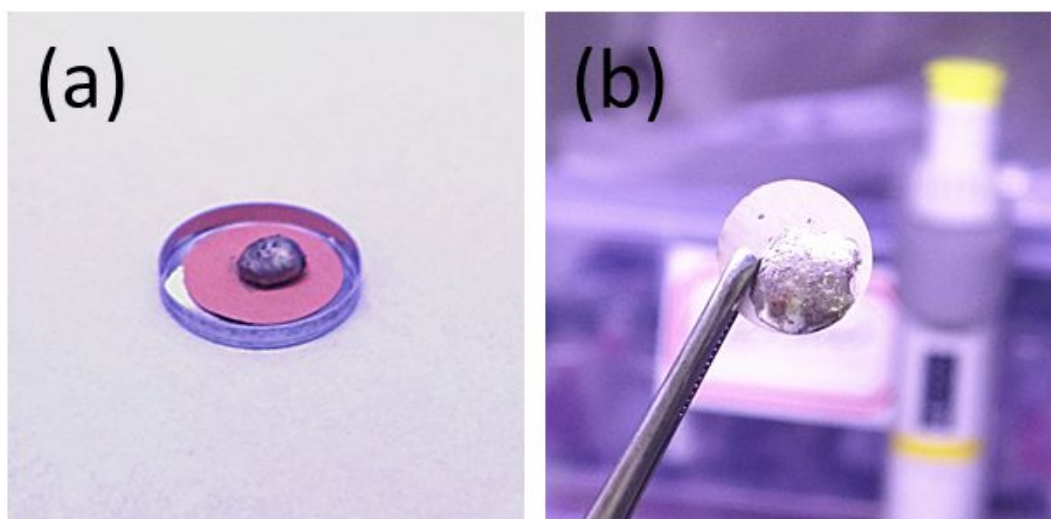

**Figure S2.** Lithiophilicity difference between bare Cu foil (a) and CuAg-1.5 sample (b), by placing molten Li onto them.

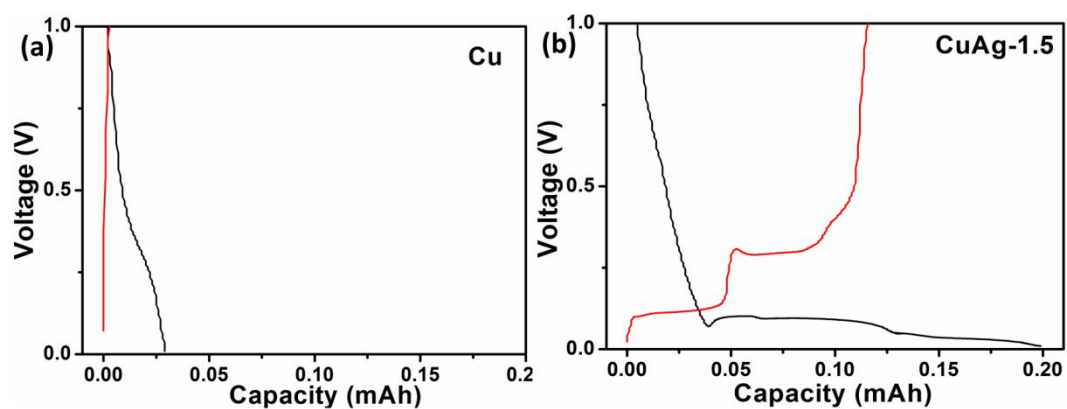

**Figure S3.** First charge/discharge cycles of (a) Cu foil and (b) CuAg-1.5 sample using Li foil as the counter/reference electrode from 0.01 V to 1 V at  $0.2 \text{ mA cm}^{-2}$ .

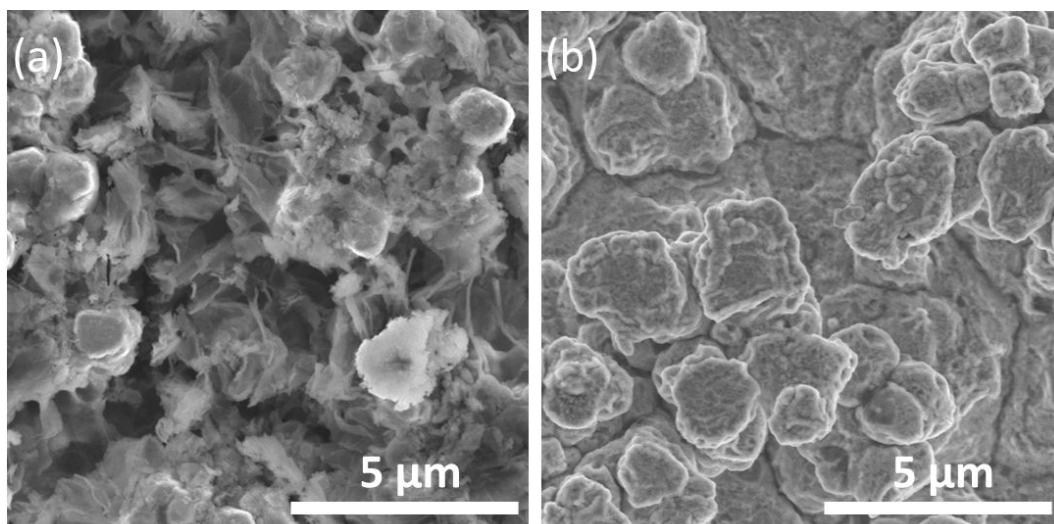

**Figure S4.** SEM images of (a) Cu foil and (b) CuAg-1.5 sample current collectors after Li stripping  $2 \text{ mAh cm}^{-2}$  (recharged to 0.5 V).

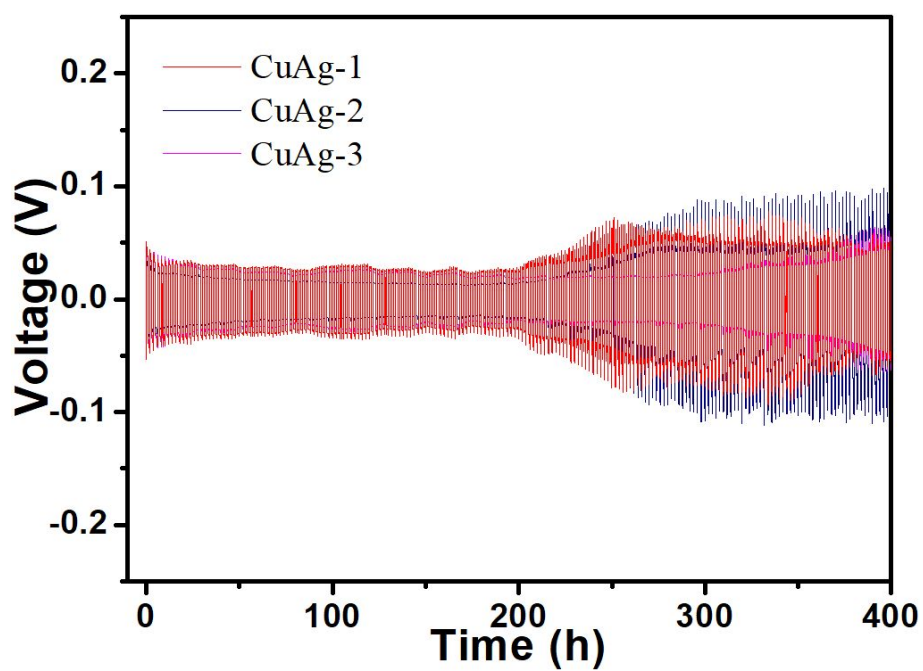

**Figure S5.** The voltage-time curves of Li anode plating/stripping with a cycling capacity of  $1 \text{ mAh cm}^{-2}$  at  $1 \text{ mA cm}^{-2}$  of CuAg-1, CuAg-2 and CuAg-3 samples.

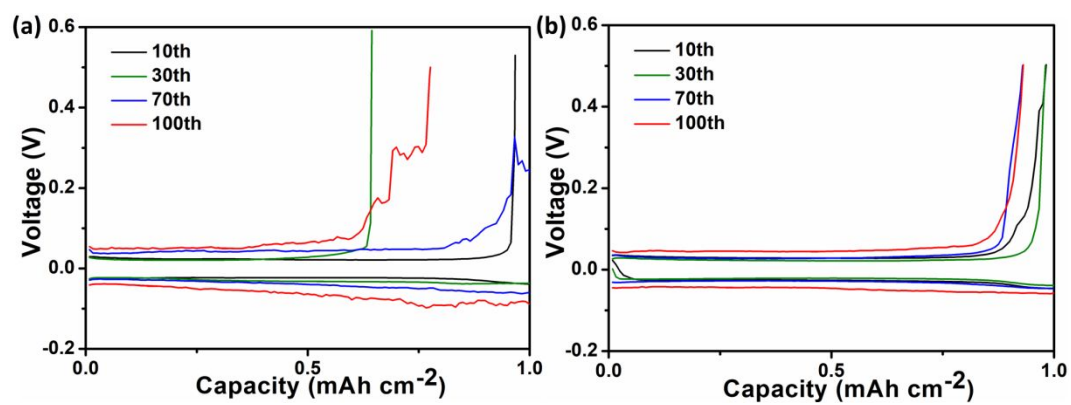

**Figure S6.** The voltage-capacity curves of the 10th, 30th, 70th, and 100th cycle of Cu (a) foil and CuAg-1.5 sample (b) with a cycling capacity of 1 mAh cm<sup>-2</sup> at 1 mA cm<sup>-2</sup>.

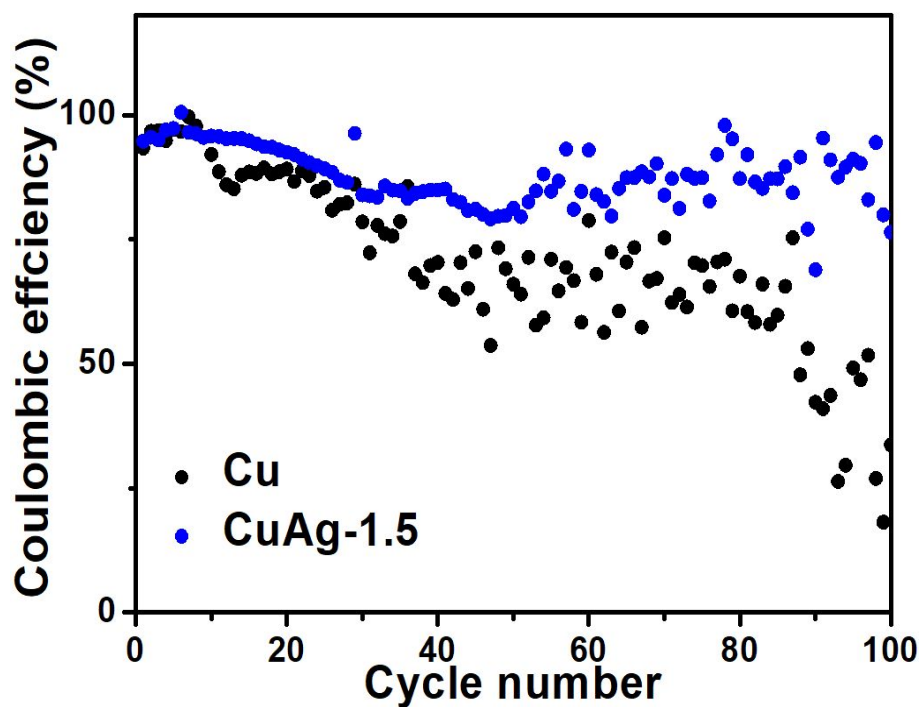

**Figure S7.** Coulombic efficiencies of the Cu foil and CuAg-1.5 sample with an areal capacity of  $1 \text{ mAh cm}^{-2}$  at  $1 \text{ mA cm}^{-2}$  using 2 wt%  $\text{LiNO}_3$  additives. The CuAg-1.5 sample presents the average CE of 88% for 100 cycles, while the Cu foil exhibits a much lower average CE of 70%.



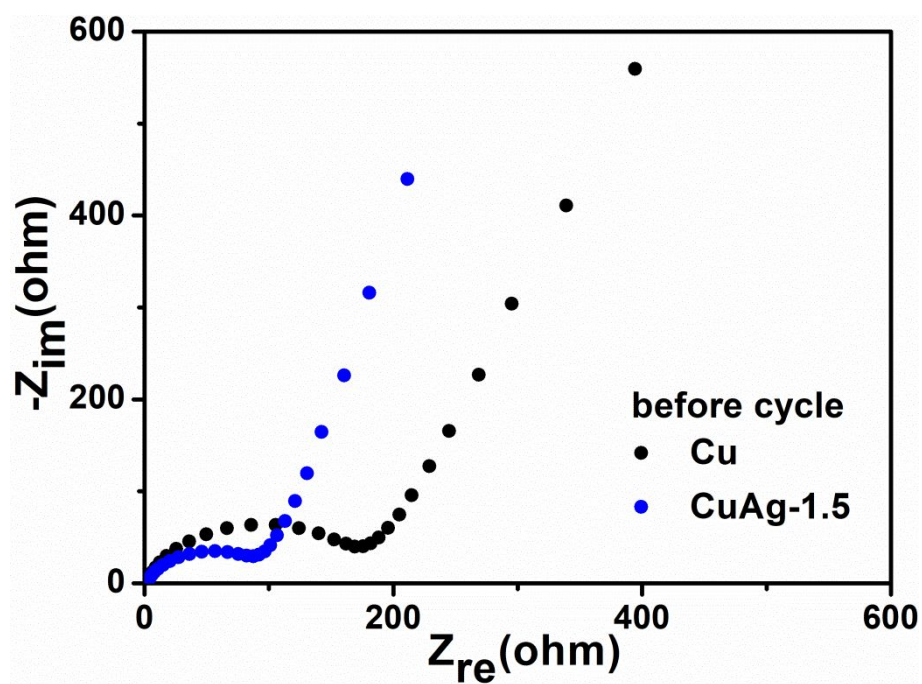

**Figure S8.** The Nyquist curves of the Cu foil and CuAg-1.5 sample in symmetrical cells before cycling.

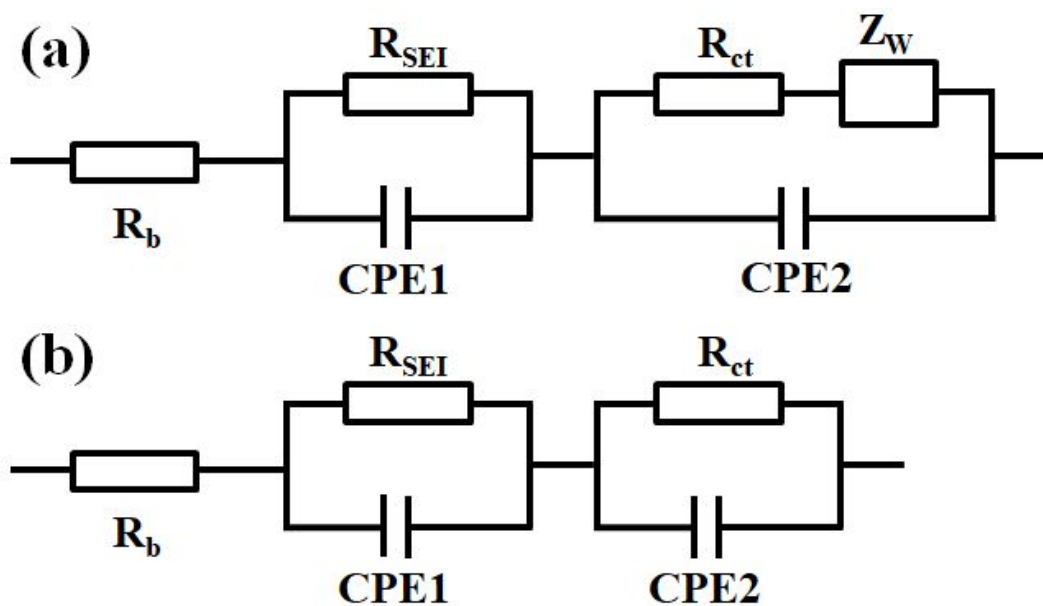

**Figure S9.** Equivalent circuit model for EIS plots of (a) Cu foil and (b) CuAg-1.5 sample.

We use two different equivalent circuits for Cu foil and CuAg-1.5 sample, that is, Warburg element ( $Z_w$ ) is used in the equivalent circuit for Cu foil but not for CuAg-1.5 sample. This is because a straight line related to mass transfer control has been observed in low frequency range in the Nyquist curves of Cu foil, although it is not completely shown.

**Table S1.** Electrochemical impedance fitted results of equivalent circuit models of the Cu foil and CuAg-1.5 sample after 100 cycles.

|                 | $R_b (\Omega)$ | $R_{SEI} (\Omega)$ | $R_{ct} (\Omega)$ |
|-----------------|----------------|--------------------|-------------------|
| Bare Cu foil    | 11.87          | 37.87              | 19.44             |
| CuAg-1.5 sample | 2.39           | 1.44               | 11.99             |

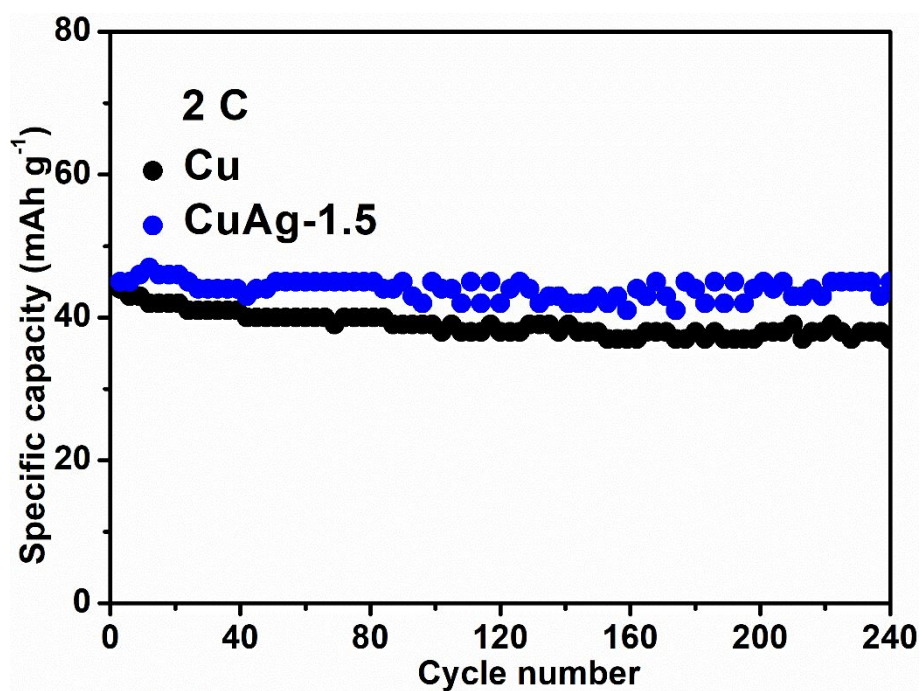

**Figure S10.** Cycling performances of Li@Cu||LFP and Li@CuAg-1.5||LFP full cells at 2 C.

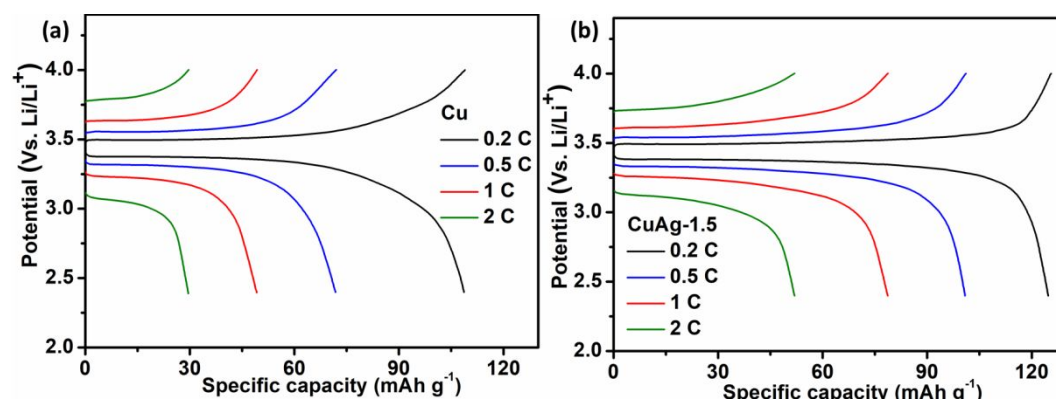

**Figure S11.** Charge-discharge curves of Li@Cu||LFP (a) and Li@CuAg-1.5||LFP full cells (b) at rates of 0.2 C, 0.5 C, 1 C and 2 C.
